# Supplementary material for: Architecture of the native major royal jelly protein 1 oligomer
Source: PubMed Central journal article supplement (PMC6105727; doi:10.1038/s41467-018-05619-1), 2018-08-22
Supplement: 41467_2018_5619_MOESM2_ESM.pdf [file 41467_2018_5619_MOESM2_ESM.pdf]

## Description of Additional Supplementary Files

*File Name:* Supplementary Data 1

*Description:* The experimental SAXS data of MRJP1 oligomer.

*File Name:* Supplementary Movie 1

*Description:* Structure of MRJP1-apisimin-24-methylenecholesterol complex and its enlargement in mp4 format.
